# Supplementary material
Source: PubMed Central journal article supplement (PMC6476456)
Supplement: CONC-26-e147-s001.pdf [file CONC-26-e147-s001.pdf]

## **Supplemental Materials for**

### **A systematic review of acupuncture for chemotherapy-induced peripheral neuropathy (CIPN)**

K. Li BSc, D. Giustini MLS, MEd, D. Seely ND, MSc

Correspondence to: Kevin Li, Faculty of Medicine, University of British Columbia, 317-2194 Health Sciences Mall, Vancouver, BC, Canada V6T1Z3. E-mail: kevin94li@alumni.ubc.ca

#### **Listing of Supplemental Material(s):**

Supplemental Appendix 1: Systematic Search Protocol

Supplemental Table 1: Search Strategy for Ovid MEDLINE(R) In-Process & Other

Supplemental Table 2: Search Strategy for: Embase 1974 to 2017 May 04

Supplemental Table 3: Search Strategy for EBM Reviews - Cochrane Central Register

Supplemental Table 4: Search Strategy for CINAHL (EBSCO)

Supplemental Table 5: Search Strategy for Web of Science

Supplemental Appendix 2: Reasons for article exclusion

Supplemental Table 7: Reasons for article exclusion

## Supplemental Appendix 1: Systematic Search Protocol

Ovid Search Strategy:

The same search strategy was used for MEDLINE, EMBASE, and Cochrane Central Register of Controlled Trials (CENTRAL), since all three databases were searched using OVID.

### Supplemental Table 1: Search Strategy for Ovid MEDLINE(R) In-Process & Other Non-Indexed Citations and Ovid MEDLINE(R) 1946 to Present

| #  | Searches                                                                                                | Results |
|----|---------------------------------------------------------------------------------------------------------|---------|
| 1  | exp Peripheral Nervous System Diseases/                                                                 | 134025  |
| 2  | exp Neuralgia/                                                                                          | 17197   |
| 3  | (neuropath* or neuralgi* or peripheral neuropathy).mp.                                                  | 138232  |
| 4  | or/1-3                                                                                                  | 218908  |
| 5  | exp Acupuncture/                                                                                        | 1482    |
| 6  | exp Acupuncture Therapy/                                                                                | 20791   |
| 7  | exp Acupuncture Analgesia/                                                                              | 1131    |
| 8  | (acupuncture or acupressure or electroacupuncture or electro-acupuncture or acupoint*).mp.              | 25329   |
| 9  | or/5-8                                                                                                  | 26117   |
| 10 | exp Drug Therapy/                                                                                       | 1227888 |
| 11 | (chemotherapy or CIPN or chemotherapy induced peripheral neuropathy or chemically induced disorder).mp. | 376353  |
| 12 | (Paclitaxel or Oxaliplatin or Taxane).mp.                                                               | 43600   |
| 13 | exp Neoplasms/                                                                                          | 2998474 |
| 14 | cancer.mp.                                                                                              | 1379147 |
| 15 | or/10-14                                                                                                | 4292479 |
| 16 | 4 and 9 and 15                                                                                          | 136     |
| 17 | random*.mp.                                                                                             | 1138594 |
| 18 | 16 and 17                                                                                               | 41      |

### Supplemental Table 2: Search Strategy for: Embase 1974 to 2017 May 04

| #  | Searches                                                                                                | Results |
|----|---------------------------------------------------------------------------------------------------------|---------|
| 1  | exp Peripheral Nervous System Diseases/                                                                 | 59697   |
| 2  | exp Neuralgia/                                                                                          | 87647   |
| 3  | (neuropath* or neuralgi* or peripheral neuropathy).mp.                                                  | 280224  |
| 4  | or/1-3                                                                                                  | 317004  |
| 5  | exp Acupuncture/                                                                                        | 39574   |
| 6  | exp Acupuncture Therapy/                                                                                | 39574   |
| 7  | exp Acupuncture Analgesia/                                                                              | 1472    |
| 8  | (acupuncture or acupressure or electroacupuncture or electro-acupuncture or acupoint*).mp.              | 41757   |
| 9  | or/5-8                                                                                                  | 41801   |
| 10 | exp Drug Therapy/                                                                                       | 2161553 |
| 11 | (chemotherapy or CIPN or chemotherapy induced peripheral neuropathy or chemically induced disorder).mp. | 762691  |
| 12 | (Paclitaxel or Oxaliplatin or Taxane).mp.                                                               | 122586  |
| 13 | exp Neoplasms/                                                                                          | 3788182 |
| 14 | cancer.mp.                                                                                              | 2742045 |
| 15 | or/10-14                                                                                                | 5838587 |
| 16 | 4 and 9 and 15                                                                                          | 745     |
| 17 | random*.mp.                                                                                             | 1358950 |
| 18 | 16 and 17                                                                                               | 158     |

### Supplemental Table 3: Search Strategy for EBM Reviews - Cochrane Central Register of Controlled Trials (CENTRAL)

| #  | Searches                                                                                                | Results |
|----|---------------------------------------------------------------------------------------------------------|---------|
| 1  | exp Peripheral Nervous System Diseases/                                                                 | 3066    |
| 2  | exp Neuralgia/                                                                                          | 765     |
| 3  | (neuropath* or neuralgi* or peripheral neuropathy).mp.                                                  | 7858    |
| 4  | or/1-3                                                                                                  | 9193    |
| 5  | exp Acupuncture/                                                                                        | 133     |
| 6  | exp Acupuncture Therapy/                                                                                | 3591    |
| 7  | exp Acupuncture Analgesia/                                                                              | 263     |
| 8  | (acupuncture or acupressure or electroacupuncture or electro-acupuncture or acupoint*).mp.              | 9793    |
| 9  | or/5-8                                                                                                  | 9860    |
| 10 | exp Drug Therapy/                                                                                       | 123878  |
| 11 | (chemotherapy or CIPN or chemotherapy induced peripheral neuropathy or chemically induced disorder).mp. | 40209   |
| 12 | (Paclitaxel or Oxaliplatin or Taxane).mp.                                                               | 6957    |
| 13 | exp Neoplasms/                                                                                          | 48905   |
| 14 | cancer.mp.                                                                                              | 77081   |
| 15 | or/10-14                                                                                                | 207244  |
| 16 | 4 and 9 and 15                                                                                          | 24      |
| 17 | random*.mp.                                                                                             | 563670  |
| 18 | 16 and 17                                                                                               | 21      |

### Supplemental Table 4: Search Strategy for CINAHL (EBSCO)

| #   | Query                                                                                                                        | Results |
|-----|------------------------------------------------------------------------------------------------------------------------------|---------|
| S1  | (MH "Acupuncture+")                                                                                                          | 11,913  |
| S2  | (MH "Acupuncture Anesthesia")                                                                                                | 15      |
| S3  | (MH "Acupuncture Analgesia")                                                                                                 | 295     |
| S4  | TX (acupunct* or acupressure or electroacupuncture or electro-acupuncture or acupoint*)                                      | 26,433  |
| S5  | S1 OR S2 OR S3 OR S4                                                                                                         | 26,514  |
| S6  | (MH "Peripheral Nervous System Diseases+")                                                                                   | 32,199  |
| S7  | (MH "Neuralgia+")                                                                                                            | 4,759   |
| S8  | TX (Neurpath* OR Neuralg* OR "peripheral neuropathy")                                                                        | 15,586  |
| S9  | S6 OR S7 OR S8                                                                                                               | 41,567  |
| S10 | (MH "Chemotherapy, Adjuvant+")                                                                                               | 8,100   |
| S11 | (MH "Chemotherapy, Cancer+")                                                                                                 | 21,646  |
| S12 | (MH "Antineoplastic Agents, Combined")                                                                                       | 16,104  |
| S13 | TX (chemotherap* OR "Drug Therapy" OR CIPN OR "chemotherapy induced peripheral neuropathy" or "chemically induced disorder") | 478,078 |
| S14 | (MH "Neoplasms, Germ Cell and Embryonal+")                                                                                   | 26,051  |
| S15 | TX (cancer)                                                                                                                  | 510,359 |
| S16 | S10 OR S11 OR S12 OR S13 OR S14 OR S15                                                                                       | 874,598 |
| S17 | S5 AND S9 AND S16                                                                                                            | 532     |
| S18 | TX (random*)                                                                                                                 | 469,222 |
| S19 | S17 AND S18                                                                                                                  | 324     |

**Supplemental Table 5: Search Strategy for Web of Science**

| # | Searches                                                                                                                                                                                                                                  | Results   |
|---|-------------------------------------------------------------------------------------------------------------------------------------------------------------------------------------------------------------------------------------------|-----------|
| 1 | TS = (neuropath* OR neuralgi* OR "peripheral neuropathy")<br><i>Indexes=SCI-EXPANDED, SSCI, A&amp;HCI, CPCI-S, CPCI-SSH, ESCI</i><br><i>Timespan=All years</i>                                                                            | 143,728   |
| 2 | TS = (Chemotherap* OR "Drug Therapy" OR CIPN OR<br>"chemotherapy induced peripheral neuropathy" or "chemically<br>induced disorder")<br><i>Indexes=SCI-EXPANDED, SSCI, A&amp;HCI, CPCI-S, CPCI-SSH, ESCI</i><br><i>Timespan=All years</i> | 405,979   |
| 3 | TS = (cancer OR neoplasm)<br><i>Indexes=SCI-EXPANDED, SSCI, A&amp;HCI, CPCI-S, CPCI-SSH, ESCI</i><br><i>Timespan=All years</i>                                                                                                            | 1,994,891 |
| 4 | #3 OR #2<br><i>Indexes=SCI-EXPANDED, SSCI, A&amp;HCI, CPCI-S, CPCI-SSH, ESCI</i><br><i>Timespan=All years</i>                                                                                                                             | 2,159,848 |
| 5 | TS = (Acupunct* OR acupressure OR electroacupuncture OR electro-<br>acupuncture or acupoint*)<br><i>Indexes=SCI-EXPANDED, SSCI, A&amp;HCI, CPCI-S, CPCI-SSH, ESCI</i><br><i>Timespan=All years</i>                                        | 17,910    |
| 6 | #5 AND #4 AND #1<br><i>Indexes=SCI-EXPANDED, SSCI, A&amp;HCI, CPCI-S, CPCI-SSH, ESCI</i><br><i>Timespan=All years</i>                                                                                                                     | 89        |
| 7 | TS = (random*)<br><i>Indexes=SCI-EXPANDED, SSCI, A&amp;HCI, CPCI-S, CPCI-SSH, ESCI</i><br><i>Timespan=All years</i>                                                                                                                       | 1,495,258 |
| 8 | #7 AND #6<br><i>Indexes=SCI-EXPANDED, SSCI, A&amp;HCI, CPCI-S, CPCI-SSH, ESCI</i><br><i>Timespan=All years</i>                                                                                                                            | 44        |

**Search Strategy for Clinical Trials.gov**

Combinations of the terms acupuncture and chemotherapy-induced peripheral neuropathy were entered into the "Search Terms" search box yielding sixteen (16) results.

**Supplemental Appendix 2: Reasons for article exclusion****Supplemental Table 7: Reasons for article exclusion**

| Authors                          | Study                                                                                                                                                               | Reason for exclusion                                               |
|----------------------------------|---------------------------------------------------------------------------------------------------------------------------------------------------------------------|--------------------------------------------------------------------|
| Awad 2015 <sup>(1)</sup>         | Randomized sham controlled pilot trial of weekly electro-acupuncture for the prevention of taxane-induced peripheral neuropathy.                                    | Assessed prevention of CIPN; Previous publication of Greenlee 2016 |
| Cai 2013 <sup>(2)</sup>          | Acupuncture combined with methylcobalamin for chemotherapy-induced peripheral neuropathy of patients with myeloma.                                                  | Conference abstract of Han 2017 study                              |
| Sima 2009 <sup>(3)</sup>         | Randomized clinical trial on the effectiveness of electroacupuncture for neuropathic cancer pain                                                                    | Did not assess CIPN                                                |
| Sima 2009 <sup>(4)</sup>         | Efficacy of electroacupuncture for bone metastatic cancer patients with neuropathic pain: A randomized controlled trial                                             | Did not assess CIPN                                                |
| Minton 2007 <sup>(5)</sup>       | Electroacupuncture as an Adjunctive Treatment to Control Neuropathic Pain in Patients with Cancer                                                                   | Did not assess CIPN                                                |
| Akhileswaran 2010 <sup>(6)</sup> | A randomized controlled trial (RCT) using different acupuncture techniques for better pain relief in hospice patients with chronic cancer pain                      | Did not assess CIPN                                                |
| Visovsky 2008 <sup>(7)</sup>     | Evaluation and management of peripheral neuropathy in diabetic patients with cancer.                                                                                | Did not assess CIPN                                                |
| Xu 2010 <sup>(8)</sup>           | [Clinical randomized controlled study on acupuncture for treatment of peripheral neuropathy induced by chemotherapeutic drugs].                                     | Full text was in Chinese                                           |
| Cao 2015 <sup>(9)</sup>          | Electroacupuncture reduces peripheral neurotoxicity and improves quality of life in cancer patients with Vinca alkaloids chemotherapy                               | Inadequate control; compared 2 types of acupuncture                |
| Schroeder 2012 <sup>(10)</sup>   | Acupuncture for chemotherapy-induced peripheral neuropathy (CIPN): a pilot study using neurography.                                                                 | Non-RCT                                                            |
| Bao 2014 <sup>(11)</sup>         | A pilot study of acupuncture in treating bortezomib-induced peripheral neuropathy in patients with multiple myeloma                                                 | Non-RCT                                                            |
| Hsieh 2016 <sup>(12)</sup>       | Laser acupuncture attenuates oxaliplatin-induced peripheral neuropathy in patients with gastrointestinal cancer: a pilot prospective cohort study                   | Non-RCT                                                            |
| Wang 2011 <sup>(13)</sup>        | Electroacupuncture is an effective therapeutic modality for bortezomibor thalidomide-induced peripheral neuropathy in patients with multiple myeloma: A pilot study | Non-RCT                                                            |
| Garcia 2014 <sup>(14)</sup>      | Electroacupuncture for thalidomide/bortezomib-induced peripheral neuropathy in multiple myeloma: a feasibility study.                                               | Non-RCT                                                            |
| Paley 2015 <sup>(15)</sup>       | Acupuncture for cancer pain in adults                                                                                                                               | Non-RCT (Systematic Review). Did not assess CIPN                   |
| Kessler 2010 <sup>(16)</sup>     | Acupuncture and the treatment of cancer pain.                                                                                                                       | Non-RCT (Systematic Review). Did not assess CIPN                   |
| Kim 2013 <sup>(17)</sup>         | Electroacupuncture reduces peripheral neurotoxicity and improves quality of life in cancer patients with Vinca alkaloids chemotherapy                               | Protocol                                                           |
| Kim 2016 <sup>(18)</sup>         | Electroacupuncture for chemotherapy-induced peripheral neuropathy: A pilot multicenter randomized, patient-assessor blinded, controlled trial.                      | Protocol.                                                          |
| Bao 2013 <sup>(19)</sup>         | Acupuncture to prevent chemotherapy dose reduction due to chemotherapy-induced peripheral neuropathy in breast cancer patients                                      | Protocol/ongoing                                                   |
| Xiong 2016 <sup>(20)</sup>       | Clinical efficacy of acupoint injection for chemotherapy-induced peripheral neuropathy of patients with breast cancer                                               | Wrong treatment (acupoint injection)                               |
| Ogawa 2013 <sup>(21)</sup>       | Efficacy of Contact Needle Therapy for Chemotherapy-Induced Peripheral Neuropathy.                                                                                  | Wrong treatment (contact needle therapy)                           |
| Yoon 2012 <sup>(22)</sup>        | Sweet bee venom pharmacopuncture for chemotherapy-induced peripheral neuropathy.                                                                                    | Wrong treatment (pharmacopuncture)                                 |
| Wong 2015 <sup>(23)</sup>        | Phase 2 Study of Acupuncture-Like Transcutaneous Nerve Stimulation for Chemotherapy-Induced Peripheral Neuropathy.                                                  | Wrong treatment ( transcutaneous nerve stimulation)                |

## References:

1. Awad D, Greenlee H, Crew KD, et al. Randomized sham controlled pilot trial of weekly electro-acupuncture for the prevention of taxane-induced peripheral neuropathy. Vol. 33, *Journal of clinical oncology*. American Society of Clinical Oncology; 2015. [Available at: <http://ovidsp.ovid.com/ovidweb.cgi?T=JS&PAGE=reference&D=cctr&NEWS=N&AN=CN-01129792>]
2. Zhen C, Wang L, Shi H, et al. Acupuncture combined with methylcobalamin for chemotherapy-induced peripheral neuropathy of patients with myeloma. Vol. 13, *Clinical lymphoma, myeloma & leukemia*. Elsevier Inc.; 2013. p. S226. [Available at: <http://ovidsp.ovid.com/ovidweb.cgi?T=JS&PAGE=reference&D=cctr&NEWS=N&AN=CN-01027824>]
3. Sima L, Yin C. Randomized clinical trial on the effectiveness of electroacupuncture for neuropathic cancer pain. *Ann Oncol*. 2009;20:70. [Available at: <http://ovidsp.ovid.com/ovidweb.cgi?T=JS&PAGE=reference&D=emed12&NEWS=N&AN=70324264>]
4. Sima L, Yin C. Efficacy of electroacupuncture for bone metastatic cancer patients with neuropathic pain: A randomized controlled trial. *J Clin Oncol*. 2009;27:491. [Available at: <http://ovidsp.ovid.com/ovidweb.cgi?T=JS&PAGE=reference&D=cctr&NEWS=N&AN=CN-00793469>]
5. Minton O, Higginson IJ. Electroacupuncture as an Adjunctive Treatment to Control Neuropathic Pain in Patients with Cancer. *J Pain Symptom Manage*. 2007;33:115–7.
6. Akhileswaran R, Lim WT, Ong S, Tong FH, Tan SB, Tan HC. A randomized controlled trial (RCT) using different acupuncture techniques for better pain relief in hospice patients with chronic cancer pain. *Eur J Pain Suppl*. 2010;4:128. [Available at: <http://ovidsp.ovid.com/ovidweb.cgi?T=JS&PAGE=reference&D=emed12&NEWS=N&AN=70161132>]
7. Visovsky C, Meyer RR, Roller J, Poppas M. Evaluation and management of peripheral neuropathy in diabetic patients with cancer. *Clin J Oncol Nurs*. 2008;12:243–7. [Available at: <http://search.ebscohost.com/login.aspx?direct=true&db=ccm&AN=105914870&site=ehost-live>]
8. Xu WR, Hua BJ, Hou W, Bao YJ. [Clinical randomized controlled study on acupuncture for treatment of peripheral neuropathy induced by chemotherapeutic drugs]. *Zhongguo Zhen Jiu*. 2010;30:457–60. [Available at: <http://ovidsp.ovid.com/ovidweb.cgi?T=JS&PAGE=reference&D=med6&NEWS=N&AN=20578381>]
9. Cao S-C, Zhong Y, Zhang H. Electroacupuncture reduces peripheral neurotoxicity and improves quality of life in cancer patients with Vinca alkaloids chemotherapy. *J Pract Oncol*. 2015;30:374–6. [Available at: <http://ovidsp.ovid.com/ovidweb.cgi?T=JS&PAGE=reference&D=cctr&NEWS=N&AN=CN-01098104>]
10. Schroeder S, Meyer-Hamme G, Epplee S. Acupuncture for chemotherapy-induced peripheral neuropathy (CIPN): a pilot study using neurography. *Acupunct Med*. 2012;30:4–7. [Available at: <http://ovidsp.ovid.com/ovidweb.cgi?T=JS&PAGE=reference&D=med7&NEWS=N&AN=22146780>]
11. Bao T, Goloubeva O, Pelsler C, et al. A Pilot Study of Acupuncture in Treating Bortezomib-Induced Peripheral Neuropathy in Patients With Multiple Myeloma. *Integr Cancer Ther*. 2014;13:396–404. [Available at: <http://www.ncbi.nlm.nih.gov/pubmed/24867959>]
12. Hsieh Y-L, Chou L-W, Hong S-F, et al. Laser acupuncture attenuates oxaliplatin-induced peripheral neuropathy in patients with gastrointestinal cancer: a pilot prospective cohort study. *Acupunct Med*. 2016;34:398–405. [Available at: <http://ovidsp.ovid.com/ovidweb.cgi?T=JS&PAGE=reference&D=med1&NEWS=N&AN=27613370>]
13. Wang M, Garcia K, Zhou Y, et al. Electroacupuncture is an effective therapeutic modality for bortezomibor thalidomide-induced peripheral neuropathy in patients with multiple myeloma: A pilot study. *Haematologica*. 2011;96:S136. [Available at: [http://haematologica.org/content/96/supplement\\_1/S1.full-](http://haematologica.org/content/96/supplement_1/S1.full-)

text.pdf+html]

14. Garcia MK, Cohen L, Guo Y, et al. Electroacupuncture for thalidomide/bortezomib-induced peripheral neuropathy in multiple myeloma: a feasibility study. *J Hematol Oncol*. 2014;7:41. [Available at: <http://ovidsp.ovid.com/ovidweb.cgi?T=JS&PAGE=reference&D=medc&NEWS=N&AN=24886772>]
15. Paley CA, Johnson MI, Tashani OA, Bagnall A-M. Acupuncture for cancer pain in adults. *Cochrane database Syst Rev*. 2015;10:CD007753. [Available at: <http://ovidsp.ovid.com/ovidweb.cgi?T=JS&PAGE=reference&D=medl&NEWS=N&AN=26468973>]
16. Kessler HA. Acupuncture and the treatment of cancer pain. *Integr Med A Clin J*. 2010;9:22–9. [Available at: <http://search.ebscohost.com/login.aspx?direct=true&db=ccm&AN=105171256&site=ehost-live>]
17. Kim J-H, Kim E-J, Seo B-K, et al. Electroacupuncture for chemotherapy-induced peripheral neuropathy: Study protocol for a pilot multicentre randomized, patient-assessor-blinded, controlled trial. *Trials*. 2013;14:254. [Available at: <http://ovidsp.ovid.com/ovidweb.cgi?T=JS&PAGE=reference&D=cctr&NEWS=N&AN=CN-00913907>]
18. Kim JH, Eun-Jung K. Electroacupuncture for chemotherapy-induced peripheral neuropathy: A pilot multicenter randomized, patient-assessor blinded, controlled trial. *Eur J Cancer*. 2016;69:S66–S66. [Available at: <http://search.ebscohost.com/login.aspx?direct=true&db=ccm&AN=120140869&site=ehost-live>]
19. Bao T, Goloubeva O, Kirk R, et al. Acupuncture to prevent chemotherapy dose reduction due to chemotherapy-induced peripheral neuropathy in breast cancer patients. Cancer research. American Association for Cancer Research Inc.; 2013. p. no pagination. (36th Annual CTRC-AACR San Antonio Breast Cancer Symposium. San Antonio, TX United States.; vol. 73). [Available at: [http://cancerres.aacrjournals.org/content/73/24\\_Supplement/OT3-1-09.abstract?sid=26454440-cd7d-4a09-a9fe-55b4e42c7ac4](http://cancerres.aacrjournals.org/content/73/24_Supplement/OT3-1-09.abstract?sid=26454440-cd7d-4a09-a9fe-55b4e42c7ac4)]
20. Xiong Z, Wang T, Lin G, Ran J, Min J, Lu G. Clinical efficacy of acupoint injection for chemotherapy-induced peripheral neuropathy of patients with breast cancer. *World J Acupunct - Moxibustion*. 2016;26:20–4. [Available at: [http://www.elsevier.com/wps/find/journaldescription.cws\\_home/727658/description](http://www.elsevier.com/wps/find/journaldescription.cws_home/727658/description)]
21. Ogawa K, Ogawa M, Nishijima K, Tsuda M, Nishimura G. Efficacy of Contact Needle Therapy for Chemotherapy-Induced Peripheral Neuropathy. *Evidence-based Complement Altern Med*. 2013;2013:1–5. [Available at: <http://search.ebscohost.com/login.aspx?direct=true&db=ccm&AN=104063254&site=ehost-live>]
22. Yoon J, Jeon J-H, Lee Y-W, et al. Sweet bee venom pharmacopuncture for chemotherapy-induced peripheral neuropathy. *J Acupunct Meridian Stud*. 2012;5:156–65. [Available at: <http://ovidsp.ovid.com/ovidweb.cgi?T=JS&PAGE=reference&D=med7&NEWS=N&AN=22898064>]
23. Wong R, Major P, Sagar S. Phase 2 Study of Acupuncture-Like Transcutaneous Nerve Stimulation for Chemotherapy-Induced Peripheral Neuropathy. *Integr Cancer Ther*. 2015;15:153–64. [Available at: <http://ovidsp.ovid.com/ovidweb.cgi?T=JS&PAGE=reference&D=prem&NEWS=N&AN=27130723>]
